# Supplementary material for: Effect of Oral Nutritional Supplementation on Adequacy of Nutrient Intake among Picky-Eating Children at Nutritional Risk in India: A Randomized Double Blind Clinical Trial
Source: MDPI journal article supplement (doi:10.3390/nu15112528), 2023-05-29
Supplement: s1 [file s1]

**Supplementary Table S1:** Percentage of children consuming various nutrients and food groups in adequate amount in the three groups at Day1 and Day 90 when compared with EAR and recommendations for balanced diet by ICMR-NIN

|                         | ONS 1 + DC    |                |         | ONS2 + DC     |                |         | DC only       |                |         |
|-------------------------|---------------|----------------|---------|---------------|----------------|---------|---------------|----------------|---------|
|                         | Day 1 (n=107) | Day 90 (n=104) | p-value | Day 1 (n=107) | Day 90 (n=100) | p-value | Day 1 (n=107) | Day 90 (n=101) | p-value |
| Energy (Kcal)           | 17 (15.89 %)  | 38 (36.54%)    | <.001   | 10 (9.35%)    | 39 (39.00%)    | <.001   | 8(7.48 %)     | 20 (19.80 %)   | 0.014   |
| Protein (g)             | 102 (95.33%)  | 104 (100)      | NA      | 103 (96.26%)  | 100 (100.00%)  | NA      | 103 (96.26%)  | 100 (99.01%)   | 0.180   |
| Total fat (g)           | 41 (38.32%)   | 78 (75.00%)    | <.001   | 41(38.32%)    | 84 (84.00%)    | <.001   | 37 (34.58%)   | 49 (48.51%)    | 0.058   |
| CHO (g)                 | 78 (72.90%)   | 99 (95.19 %)   | <.001   | 77 (71.96%)   | 93 (93.00%)    | <.001   | 75 (70.09%)   | 81 (80.20 %)   | 0.034   |
| Calcium (mg)            | 44 (41.12%)   | 78 (75.00 %)   | <.001   | 48 (44.86%)   | 67 (67.00%)    | <.001   | 43 (40.19%)   | 49 (48.51%)    | 0.286   |
| Vitamin A (mcg)         | 50(46.73%)    | 71 (68.27%)    | 0.001   | 56 (52.34%)   | 67 (67 .00%)   | 0.013   | 16 (14.95%)   | 27 (26.73%)    | 0.048   |
| Iron (mg)               | 31 (28.97%)   | 73 (70.19%)    | <.001   | 18(16.82%)    | 61 (61.00%)    | <.001   | 19 (17.76%)   | 35 (34.65%)    | 0.004   |
| Vitamin C (mg)          | 43 (40.19%)   | 98 (94.23%)    | <.001   | 45 (42.06 %)  | 94 (94.00%)    | <.001   | 44 (41.12%)   | 58 (57.43 %)   | 0.005   |
| Thiamine (mg)           | 33 (30.84%)   | 92 (88.46%)    | <.001   | 22 (20.56 %)  | 79 (79.00%)    | <.001   | 22 (20.56%)   | 25 (24.75%)    | 0.602   |
| Milk & its products (g) | 2 (1.87 %)    | 2 (1.92%)      | 1.000   | 3 (2.80%)     | 3 (3.00%)      | 0.564   | 4 (3.74%)     | 0              | NA      |
| Pulses (g)              | 30 (28.04%)   | 23 (22.12%)    | 0.274   | 16 (14.95%)   | 19 (19.00%)    | 0.178   | 13 (12.15 %)  | 21 (20.79%)    | 0.144   |
| meat, fish, poultry (g) | 13 (12.15%)   | 26 (25.00%)    | 0.004   | 19 (17.76 %)  | 22 (22.00 %)   | 0.317   | 13 (12.15%)   | 21 (20.79 %)   | 0.041   |
| Fruits & Vegetables (g) | 9 (8.41 %)    | 11 (10.58 %)   | 0.617   | 6 (5.61 %)    | 10 (10.00%)    | 0.248   | 5 (4.67%)     | 10 (9.90%)     | 0.132   |
| Tubers (g)              | 10 (9.35 %)   | 10 (9.62%)     | 1.000   | 7 (6.54%)     | 5 (5.00%)      | 0.763   | 13 (12.15 %)  | 8 (7.92%)      | 0.439   |
| Cereals (g)             | 56 (52.34%)   | 55 (52.88 %)   | 0.862   | 49 (45.79%)   | 52 (52.00%)    | 0.178   | 45 (42.06 %)  | 49 (48.51%)    | 0.257   |
| Fats (g)                | 12 (11.21%)   | 25 (24.04%)    | 0.009   | 14 (13.08%)   | 20 (20.00%)    | 0.157   | 13 (12.15 %)  | 27 (26.73%)    | 0.008   |
| Sugars (g)              | 23 (21.50%)   | 21 (20.19%)    | 0.706   | 22 (20.56%)   | 21 (21.00%)    | 0.827   | 21 (19.63 %)  | 28 (27.72%)    | 0.117   |

Value in parenthesis denote percentages of children.

p-values from McNemar test between Day1 and Day 90 for various groups
